Figure S1a

Phylogenetic analyses of organisms (BPP,MLB,MPB)

Combined  
nlsu, nssu, RPB2

MLB for rDNA only

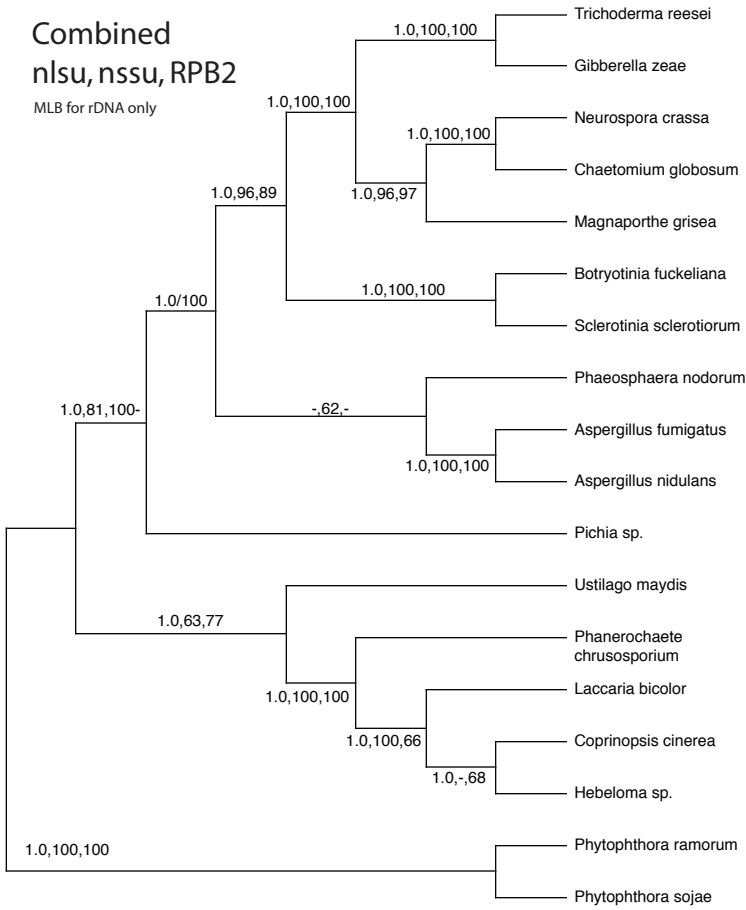

nssu

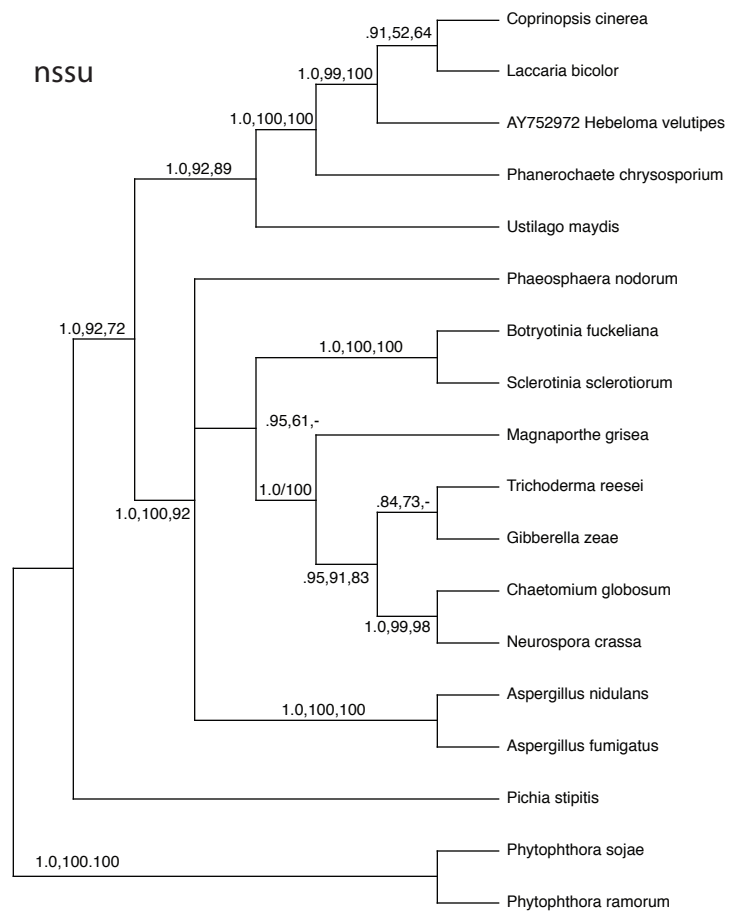

nlsu

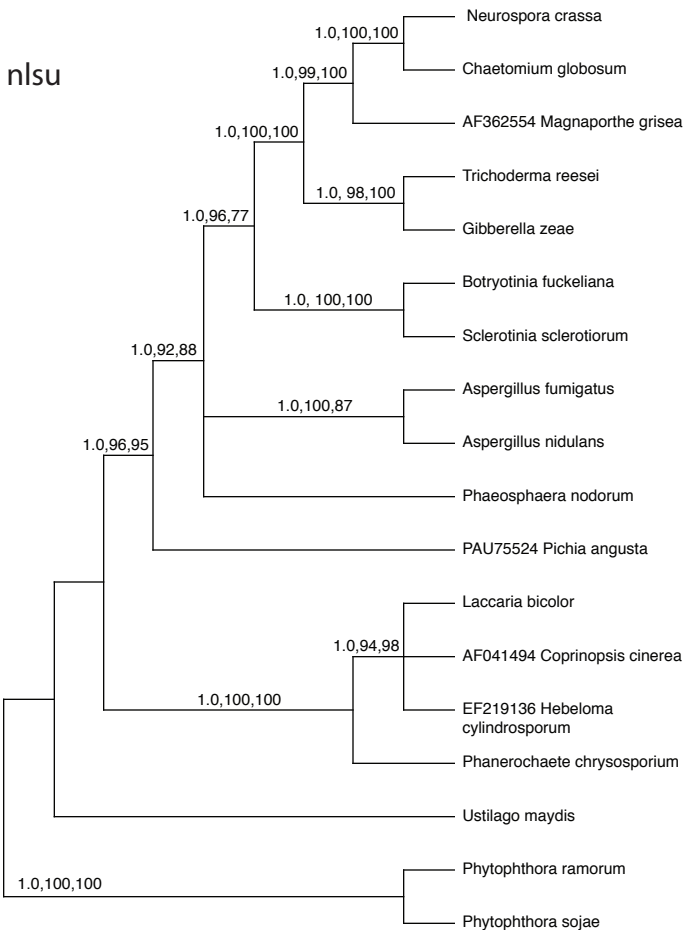

RPB2

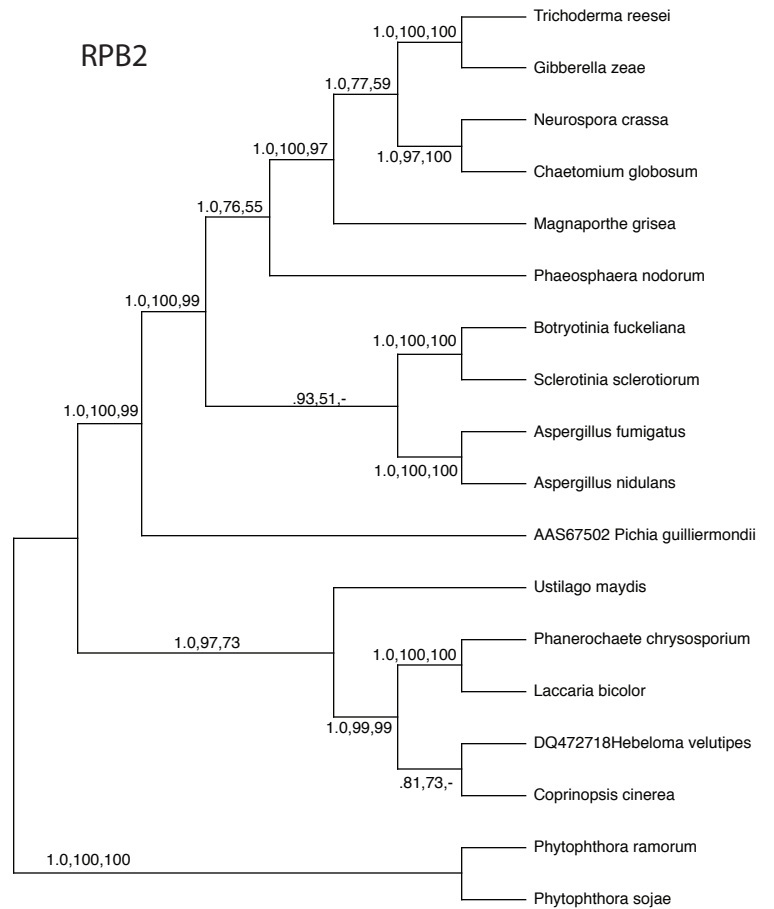

Figure S1b.

HANT-AC analyses (BPP,MLB,MPB)

Combined  
NRT2, EUKNR,  
NAD(P)H NIR

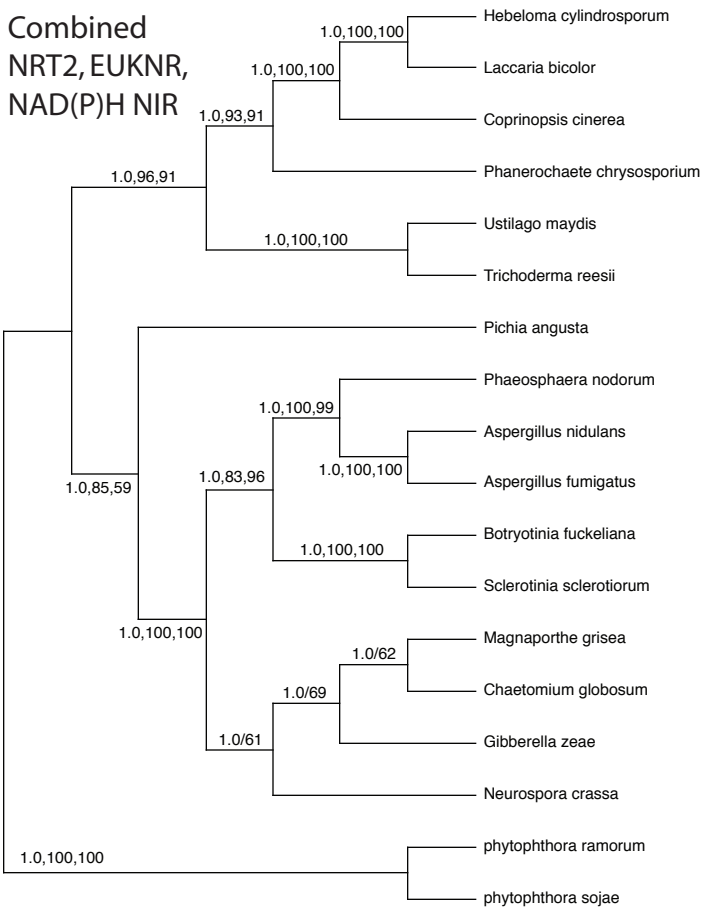

NRT2

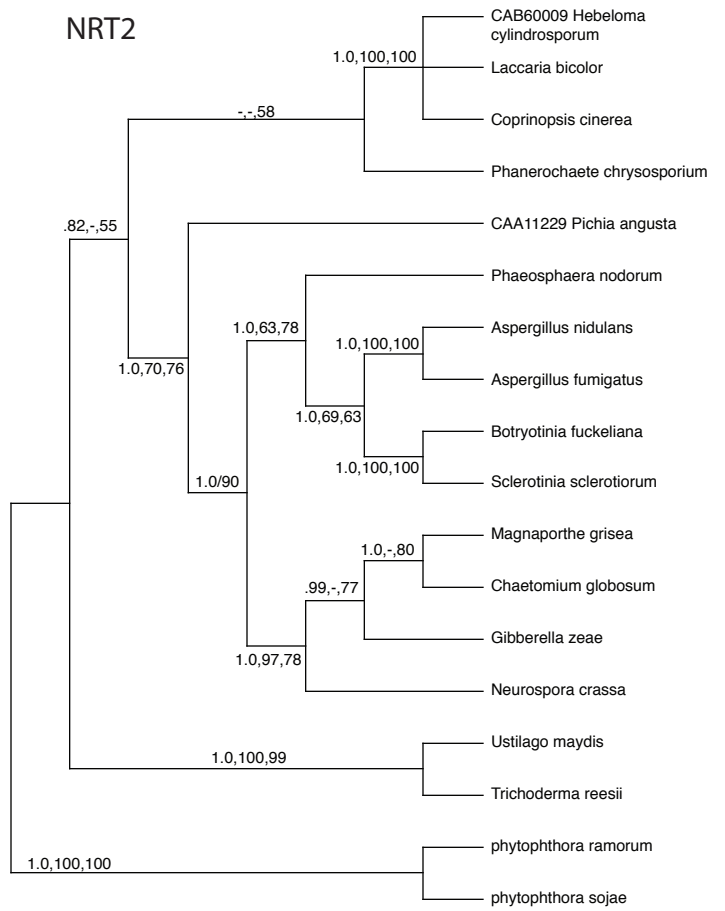

EUKNR

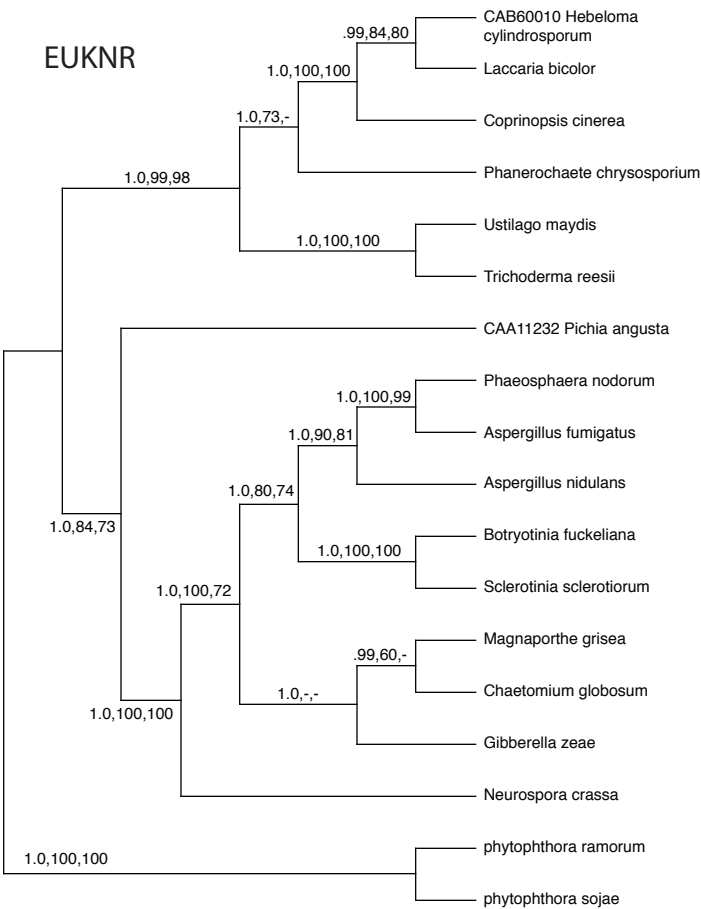

NAD(P)H NIR

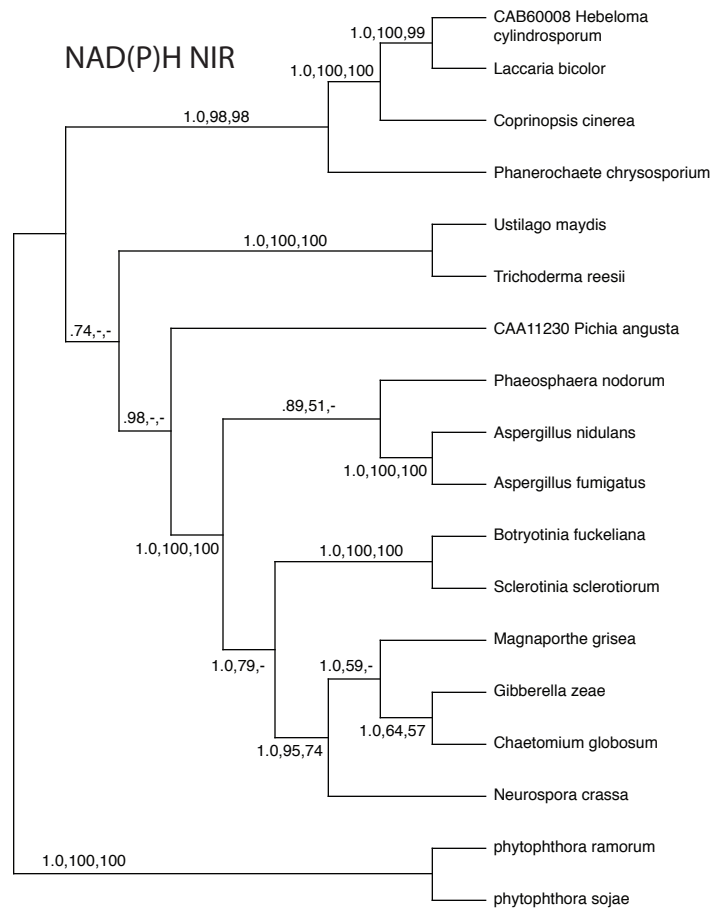

Source: https://storage.googleapis.com/plos-corpus-prod/10.1371/journal.pone.0001097/1/pone.0001097.s001.pdf
